# Supplementary material for: Highly oriented nanoplates of layered double hydroxides as an ultra slow release system
Source: Royal Society of Chemistry journal article supplement (doi:10.1039/c2cc30449j), 2012-01-01
Supplement: c2cc30449j.pdf [file c2cc30449j.pdf]

## Electronic Supplementary Information

### Highly Oriented Nanoplates of Layered Double Hydroxides as a Ultra Slow Release System

Jong Hyeon Lee<sup>a</sup> and Duk-Young Jung\*<sup>b</sup>

<sup>a</sup> *Department of Chemistry, The Catholic University of Korea, Bucheon, Gyeonggi 420-743, Korea*

<sup>b</sup> *Department of Chemistry and Sungkyunkwan Advanced Institute of Nanotechnology, Institute of Basic Sciences, Sungkyunkwan University, Suwon 440-746, South Korea*

*Fax: +82-31-290-7075*

*E-mail: dyjung@skku.edu*

#### Experimental

**Preparation of LDH-AQS:** For synthesis of MgAl-LDH-AQS, 0.20 M of MgCl<sub>2</sub>·6H<sub>2</sub>O, 0.10 M of AlCl<sub>3</sub>·9H<sub>2</sub>O, 0.15 M of anthraquinone-2-sulfonic acid sodium salt and 0.35 M of hexamethylenetetramine were dissolved in 30 mL of deionized water. The mixture was put into a Teflon-lined stainless steel autoclave, and then maintained at 180 °C for 48h. After the reaction was complete, the solid product was collected by filtration, washed with deionized water and acetone and dried at 70 °C.

**Characterizations:** X-ray diffraction (XRD) pattern was measured both on powder and films samples with a Rigaku X-ray diffractometer, D/MAX-2000 Ultima, in the  $\theta \sim 2\theta$  scanning mode at 40 kV and 30 mA using Cu-K $\alpha$  radiation ( $\lambda = 1.5405 \text{ \AA}$ ). The fourier-transform infrared spectroscopy (FT-IR) spectrum was recorded on a Biorad FTS 6000 FT-IR Spectrometer equipped with a high performance DuraSamplIR II diamond accessory with an attenuated total reflectance (ATR) mode in the range of 500–4000 cm<sup>-1</sup> with 100 scans at 4 cm<sup>-1</sup> resolution. The scanning electron microscopy (SEM) images were obtained on a JEOL 7401F (JEOL Ltd, Japan) operating at 30 kV. Before imaging, the samples were coated on carbon by sputtering with Pt to a thickness of about 3 nm. Transmission electron microscopy (TEM) images were taken on a JEOL 300KV (JEOL Ltd, Japan). The emission spectra were recorded on an Aminco-Bowman Series 2 Luminescence spectrometer equipped with a 150 W Xe lamp and a photon multiplier detector. Excitation wavelength of 280 nm was used and the emission spectra were recorded in the range of 450–750 nm.

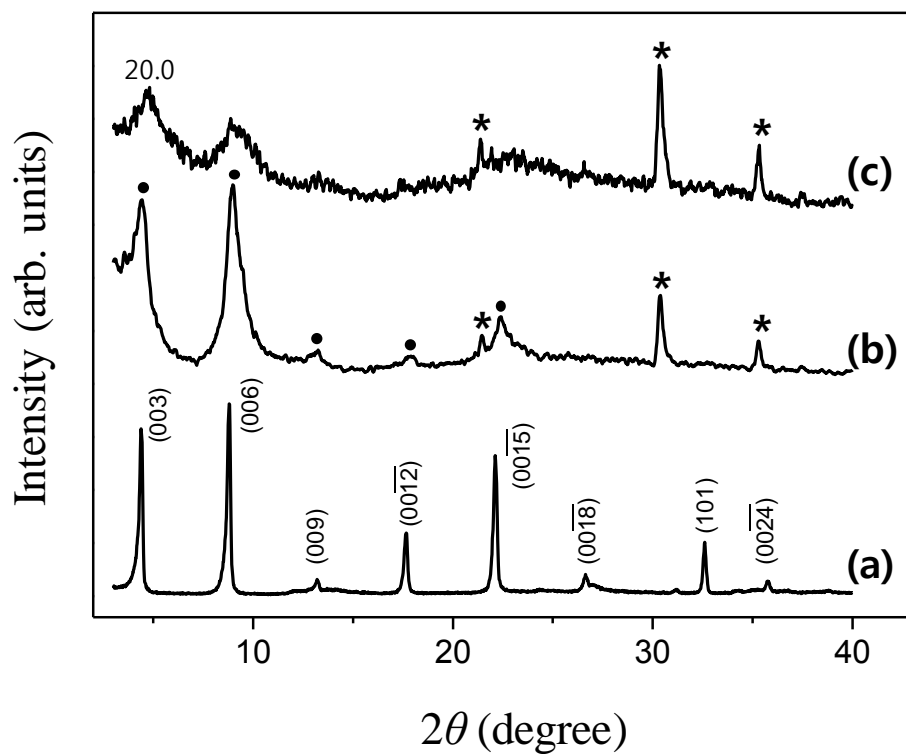

**Figure S1.** XRD patterns and basal spacing ( $\text{\AA}$ ) of (a) LDH-AQS powder, (b) LDH-AQS thin film and (c) F-LDH-AQS thin film. The black circles correspond to the  $(00l)$  harmonics for the basal spacings. The asterisk corresponds to the ITO peaks. The (b) and (c) for thin film samples also show the absence of  $(101)$  peak, meaning the high orientation of the LDH layers to the substrate plane.

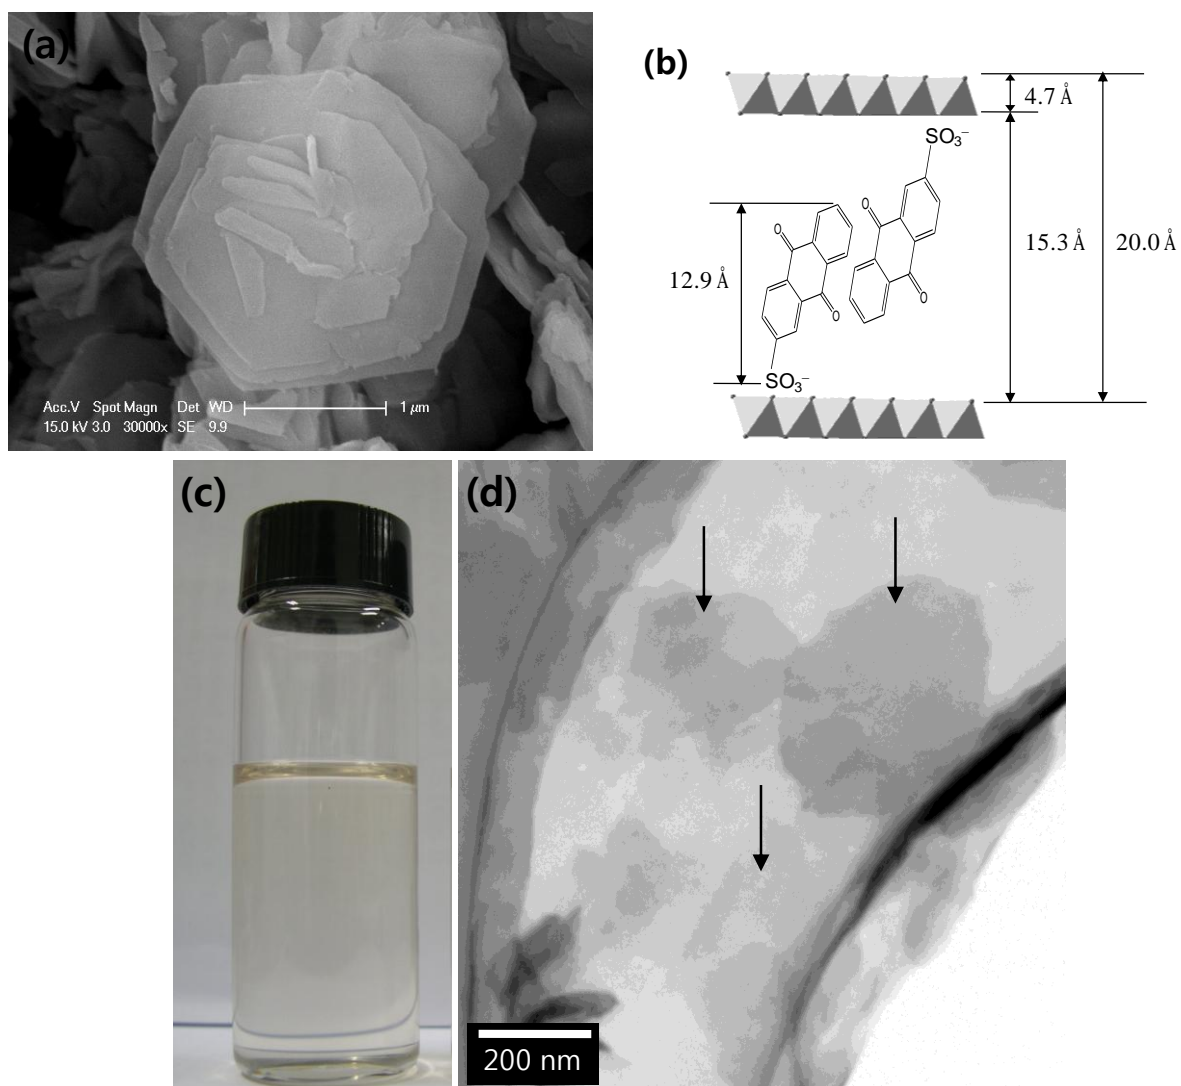

**Figure S2.** (a) SEM image of microcrystalline MgAl-LDH-AQS, (b) schematic illustration for the interlayer structure of the MgAl-LDH-AQS, (c) exfoliated MgAl-LDH-AQS nanosheet colloid solution in formamide and (d) TEM image of the LDH nanosheet. Arrows indicate LDH nanosheets

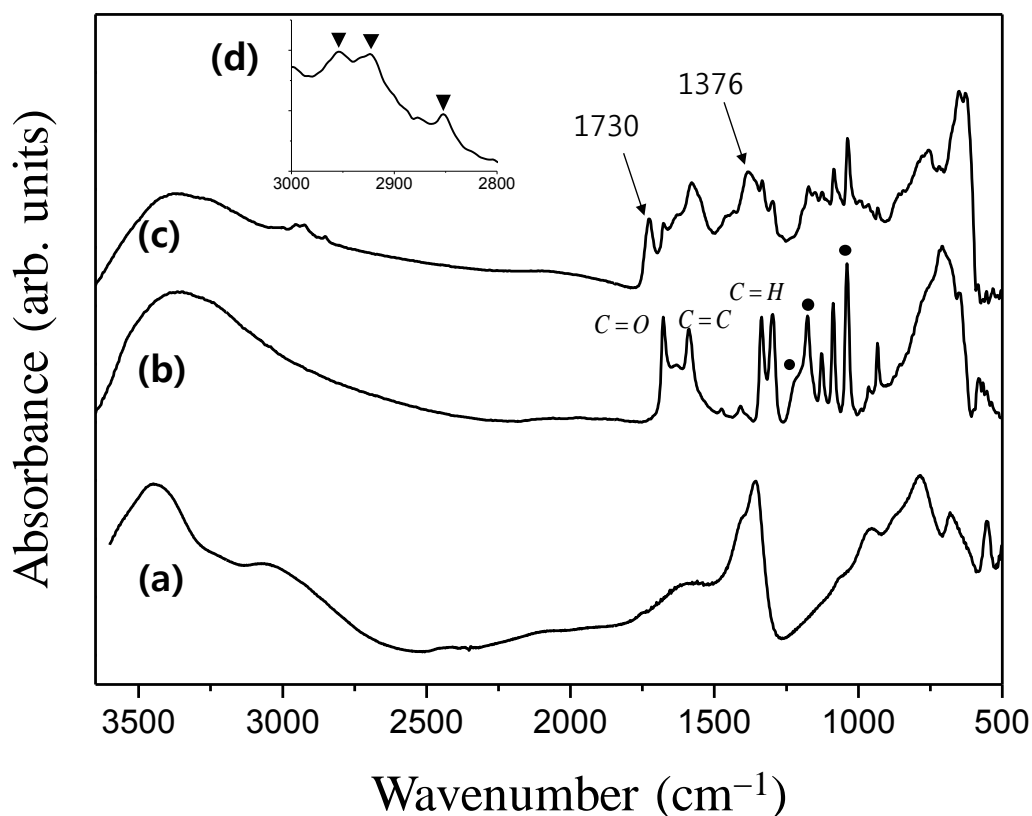

**Figure S3.** FT-IR spectrum of (a) LDH-carbonate, (b) LDH-AQS film, and (c and d) F-LDH-AQS film. The large broadband centered at 3500 cm<sup>-1</sup> is assigned to the overlapping stretching modes of hydroxyl groups present, those in both the brucite-type layer and the interlayer of water molecules. In (a), the peaks at 1361, 960 and 680 cm<sup>-1</sup> are ascribed to interlayer carbonate. In LDH-AQS film (b), the strong vibration band observed at around 1690 cm<sup>-1</sup> is assigned to the C=O stretching mode in AQS. The peaks at 1590, 1473, and 1413 cm<sup>-1</sup> are assigned to the C=C aromatic stretching mode and others at 1334 and 1300 cm<sup>-1</sup> to the C-H aromatic stretching modes in AQS. The peaks at 1213 (broad), 1176, and 1037 cm<sup>-1</sup> are attributed to the asymmetrical and symmetrical stretching modes of the interlayer sulfonate anion, respectively. In F-LDH-AQS film (c), the peaks at 1730 and 1376 cm<sup>-1</sup> are assigned to the C=O vibration and C-O vibration in cyclic ester of fluorescein dyes. Three characteristic peaks in F-LDH-AQS film (d) also indicate the aromatic stretching modes of C-H vibrations in fluorescein dyes.

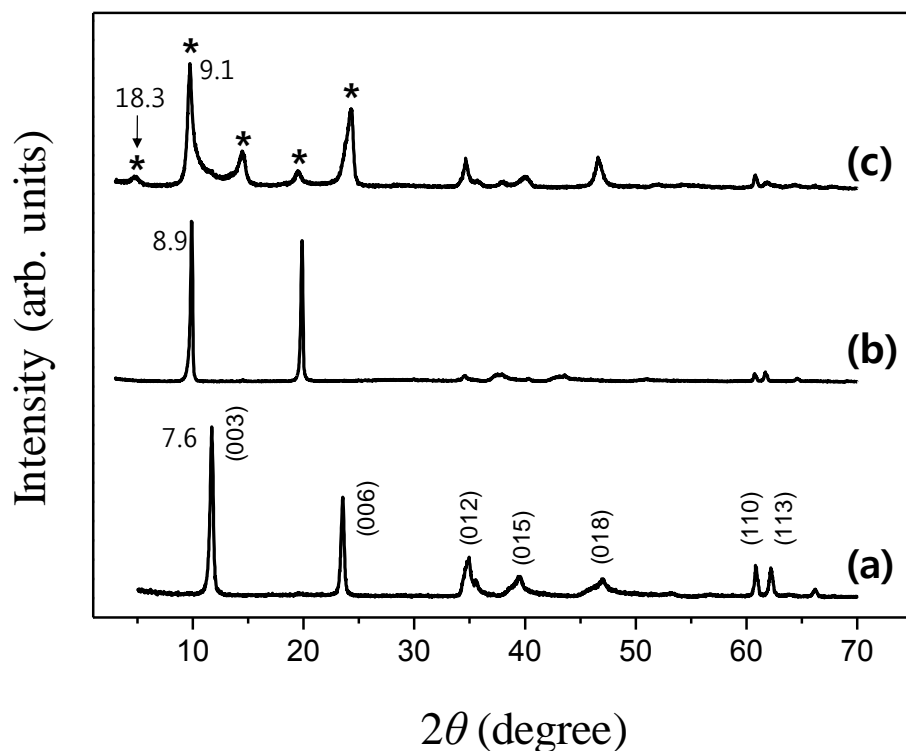

**Figure S4.** XRD patterns and basal spacing ( $\text{\AA}$ ) of (a) carbonate-LDH, (b) nitrate-LDH and (c) fluorescein-LDH. The asterisk corresponds to the  $(00l)$  harmonics. In (b) and (c), no diffraction patterns assignable to carbonate phases were detected. The relative intensity of the first two  $(00l)$  peaks in fluorescein-LDH was probably attributed to an increase in electron density in the mid-plane of the interlayers.[1,2]

#### References

- [1] P. Beaudot, M. E. de Roy, J. P. Besse, *J. Solid State Chem.*, 2001. **161**, 332–340.
- [2] P. Beaudot, M. E. de Roy, J. P. Besse, *J. Solid State Chem.*, 2004. **177**, 2691–2698.
